# Supplementary material for: EDTA-assisted hydrothermal synthesis of cubic SrF2particles and their catalytic performance for the pyrolysis of 1-chloro-1,1-difluoroethane to vinylidene fluoride
Source: Royal Society of Chemistry journal article supplement (doi:10.1039/c8ce01546e), 2018-12-21
Supplement: c8ce01546e1.pdf [file c8ce01546e1.pdf]

## Supplementary information

### **EDTA-assisted hydrothermal synthesis of cubic SrF<sub>2</sub> particles and their catalytic performance for the pyrolysis of 1-chloro-1,1- difluoroethane to vinylidene fluoride**

Zhikun Wang, Wenfeng Han\*, Huazhang Liu

Institute of Industrial Catalysis, Zhejiang University of Technology  
18 Chaowang Road, Hangzhou 310032, Zhejiang, PR China

\*Corresponding author

Email: [hanwf@zjut.edu.cn](mailto:hanwf@zjut.edu.cn)

Table S1. Textural parameters of SrF<sub>2</sub> samples

| Samples             | Specific surface area (m <sup>2</sup> /g) | Total pore volume (cm <sup>3</sup> /g) |
|---------------------|-------------------------------------------|----------------------------------------|
| SrF <sub>2</sub> -H | 15.0                                      | 0.26                                   |
| SrF <sub>2</sub> -P | 5.5                                       | 0.14                                   |

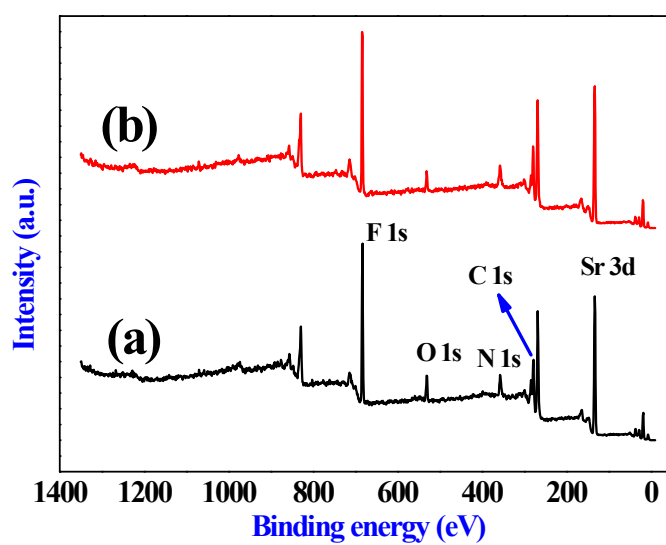

Fig. S1. The whole XPS spectrum of SrF<sub>2</sub> prepared by hydrothermal method at optimal synthesis parameters before (a) and after (b) calcination.

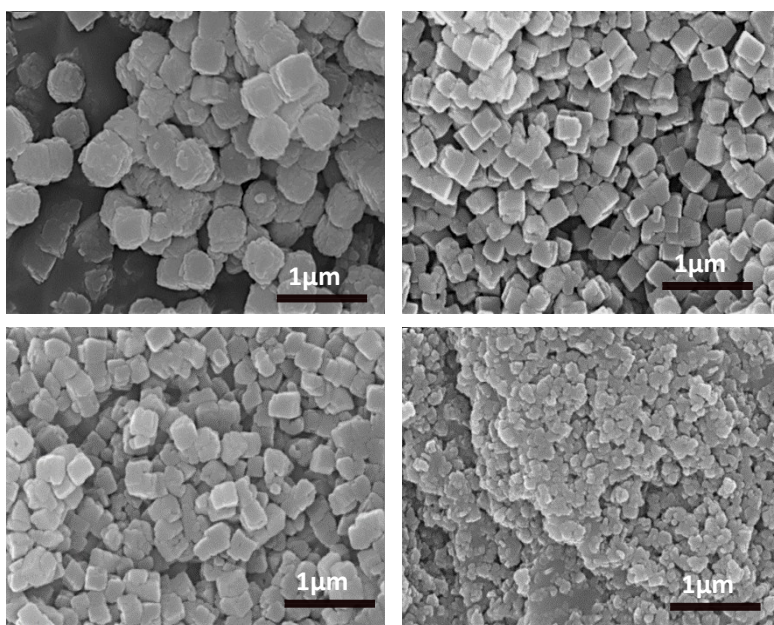

Fig. S2 SEM images of the SrF<sub>2</sub> samples obtained at different solution concentration of Sr<sup>2+</sup>: (a) 0.1M, (b) 0.25M, (c) 0.5M, (d)1M

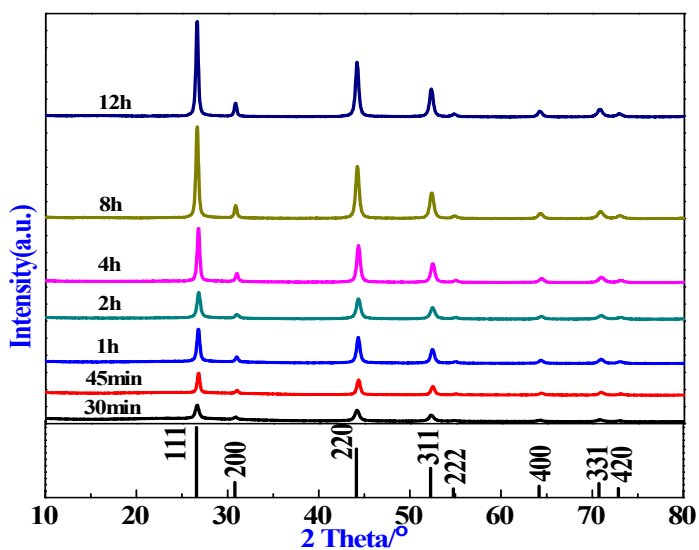

Fig. S3 X-ray diffraction patterns of the samples obtained after hydrothermal treatment for different time.

Table S2. Grain size changes of the samples obtained after hydrothermal treatment for different time.

| Time         | D <sub>111</sub> (2θ=26.6<br>) | D <sub>200</sub> (2θ=30.8) | D <sub>220</sub> (2θ=44.1) | D <sub>311</sub> (2θ=52.3<br>) | D <sub>222</sub> (2θ=54.8) | D <sub>400</sub> (2θ=62.2) | D <sub>331</sub> (2θ=70.8) | D <sub>420</sub> (2θ=72.8) |
|--------------|--------------------------------|----------------------------|----------------------------|--------------------------------|----------------------------|----------------------------|----------------------------|----------------------------|
| <b>30min</b> | 16.02                          | 16.57                      | 15.28                      | 14.14                          | 15.61                      | 14.48                      | 13.48                      | 18.12                      |
| <b>45min</b> | 17.23                          | 18.92                      | 15.13                      | 14.36                          | 14.00                      | 13.30                      | 13.68                      | 13.71                      |
| <b>1h</b>    | 20.10                          | 21.92                      | 17.64                      | 16.81                          | 17.10                      | 15.73                      | 14.88                      | 16.18                      |
| <b>2h</b>    | 21.49                          | 24.71                      | 19.07                      | 17.45                          | 18.01                      | 16.88                      | 14.89                      | 15.21                      |
| <b>4h</b>    | 22.32                          | 23.37                      | 18.57                      | 16.81                          | 16.62                      | 15.87                      | 13.94                      | 15.26                      |
| <b>8h</b>    | 21.89                          | 23.16                      | 17.63                      | 16.40                          | 16.13                      | 14.92                      | 13.47                      | 14.31                      |
| <b>12h</b>   | 23.01                          | 24.05                      | 18.48                      | 17.40                          | 16.42                      | 15.83                      | 13.83                      | 13.66                      |
